# Supplementary material for: A circadian-dependent preference for light displayed by Xenopus tadpoles is modulated by serotonin
Source: PubMed Central journal article supplement — iScience. 2022 Oct 17;25(11):105375. doi: 10.1016/j.isci.2022.105375 (PMC9636060; doi:10.1016/j.isci.2022.105375), 2022-10-17
Supplement: mmc1.pdf [file mmc1.pdf]

**iScience, Volume 25**

**Supplemental information**

**A circadian-dependent preference  
for light displayed by *Xenopus* tadpoles  
is modulated by serotonin**

**John R. Bruno, Uwemedimo G. Udoh, Jason G. Landen, Paige O. Osborn, Carson J. Asher, Jasper E. Hunt, and Kara G. Pratt**

Figure S1

Supplemental Figure 1

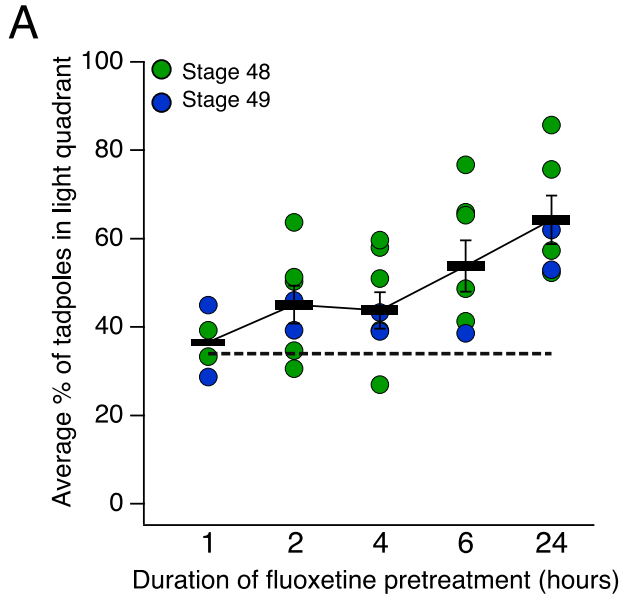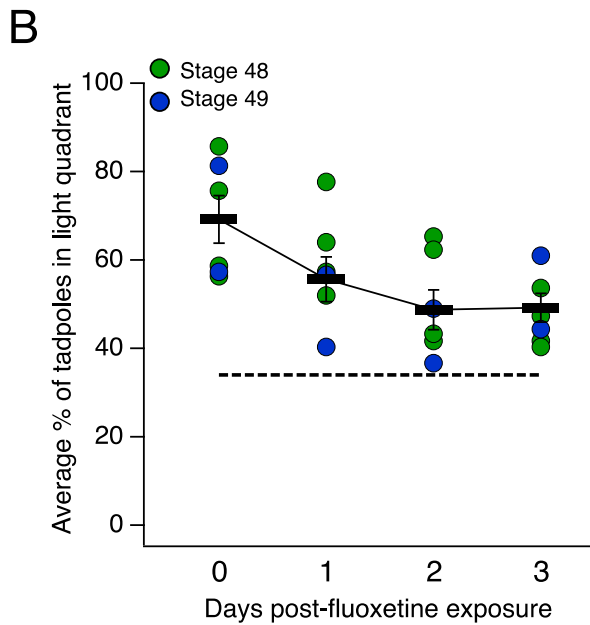

**Figure S1 legend**

Supplemental Figure 1: **Fluoxetine enhances the preference for light via a non-acute mechanism which is long-lasting, related to Figure 2.** (A) Plot showing the average preference for light as a function of fluoxetine pre-treatment time. Notice that the preference for light gradually strengthens with increasing pre-treatment times, suggesting a non-acute mechanism of action. The dashed line represents the average control preference for light for developmental stage 48 and 49 tadpoles. (B) Plot showing the average preference for light at a function of number of days post the normal 24-hour fluoxetine exposure. Notice that the effect slowly declines over the 3 days but does not return to baseline, suggesting that 24 hours of fluoxetine exposure induces a long-lasting effect on this visually guided behavior. The dashed line represents the average control preference for light for developmental stage 48 and 49 tadpoles.
